# Supplementary material
Source: MDPI journal article supplement (https://www.mdpi.com/2079-6412/10/2/130)
Supplement: s1 [file s1]

Supplementary Information

## Fully Reversible Electrically Induced Photochromic-Like Behaviour of Ag:TiO<sub>2</sub> Thin Films

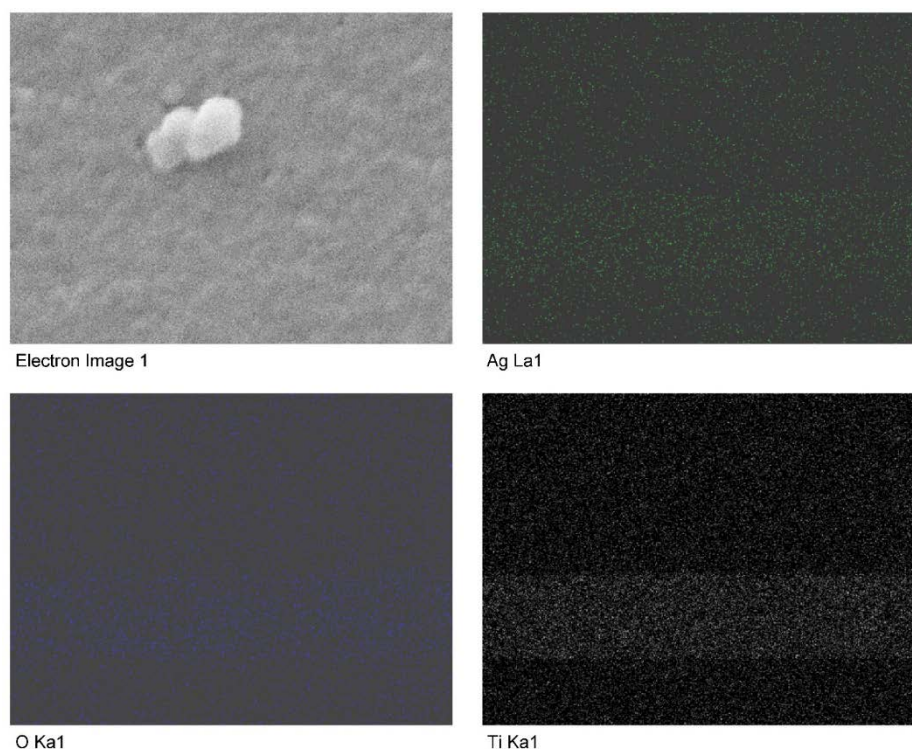

**Figure S1.** surface EDS mapping.

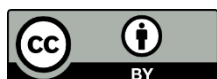

© 2019 by the authors. Submitted for possible open access publication under the terms and conditions of the Creative Commons Attribution (CC BY) license (<http://creativecommons.org/licenses/by/4.0/>).
